# Supplementary material for: Integrative Analysis Reveals Relationships of Genetic and Epigenetic Alterations in Osteosarcoma
Source: PubMed Central journal article supplement (PMC3492335; doi:10.1371/journal.pone.0048262), 2012-11-07

**Figure S1.** DNA copy number, DNA methylation and mRNA expression levels of DNA methyltransferase genes *DNMT1*, *-3A* and *-3B* (Kresse et al)

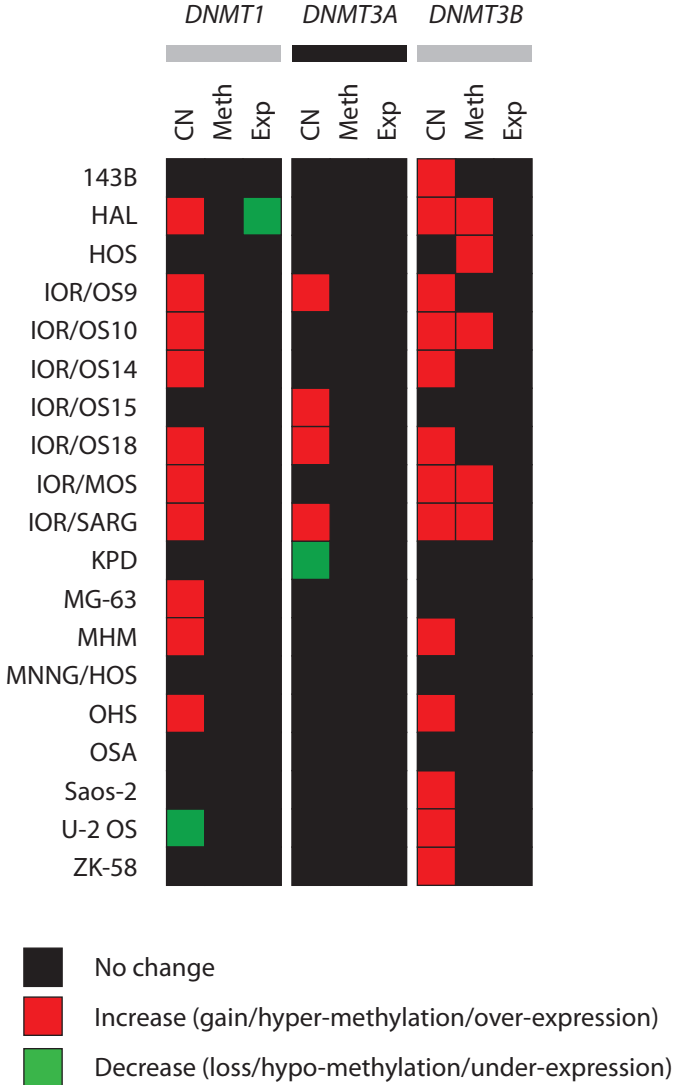

Supplement: pone.0048262.s001.pdf [file pone.0048262.s001.pdf]
