# Supplementary material for: Integrative Analysis Reveals Relationships of Genetic and Epigenetic Alterations in Osteosarcoma
Source: PLOS journal article supplement (doi:10.1371/journal.pone.0048262), 2012-11-07

**Figure S3.** Frequency plot of DNA copy number aberrations and gene density for chromosome arms 2q, 8p, 19p and 19q (Kresse et al)

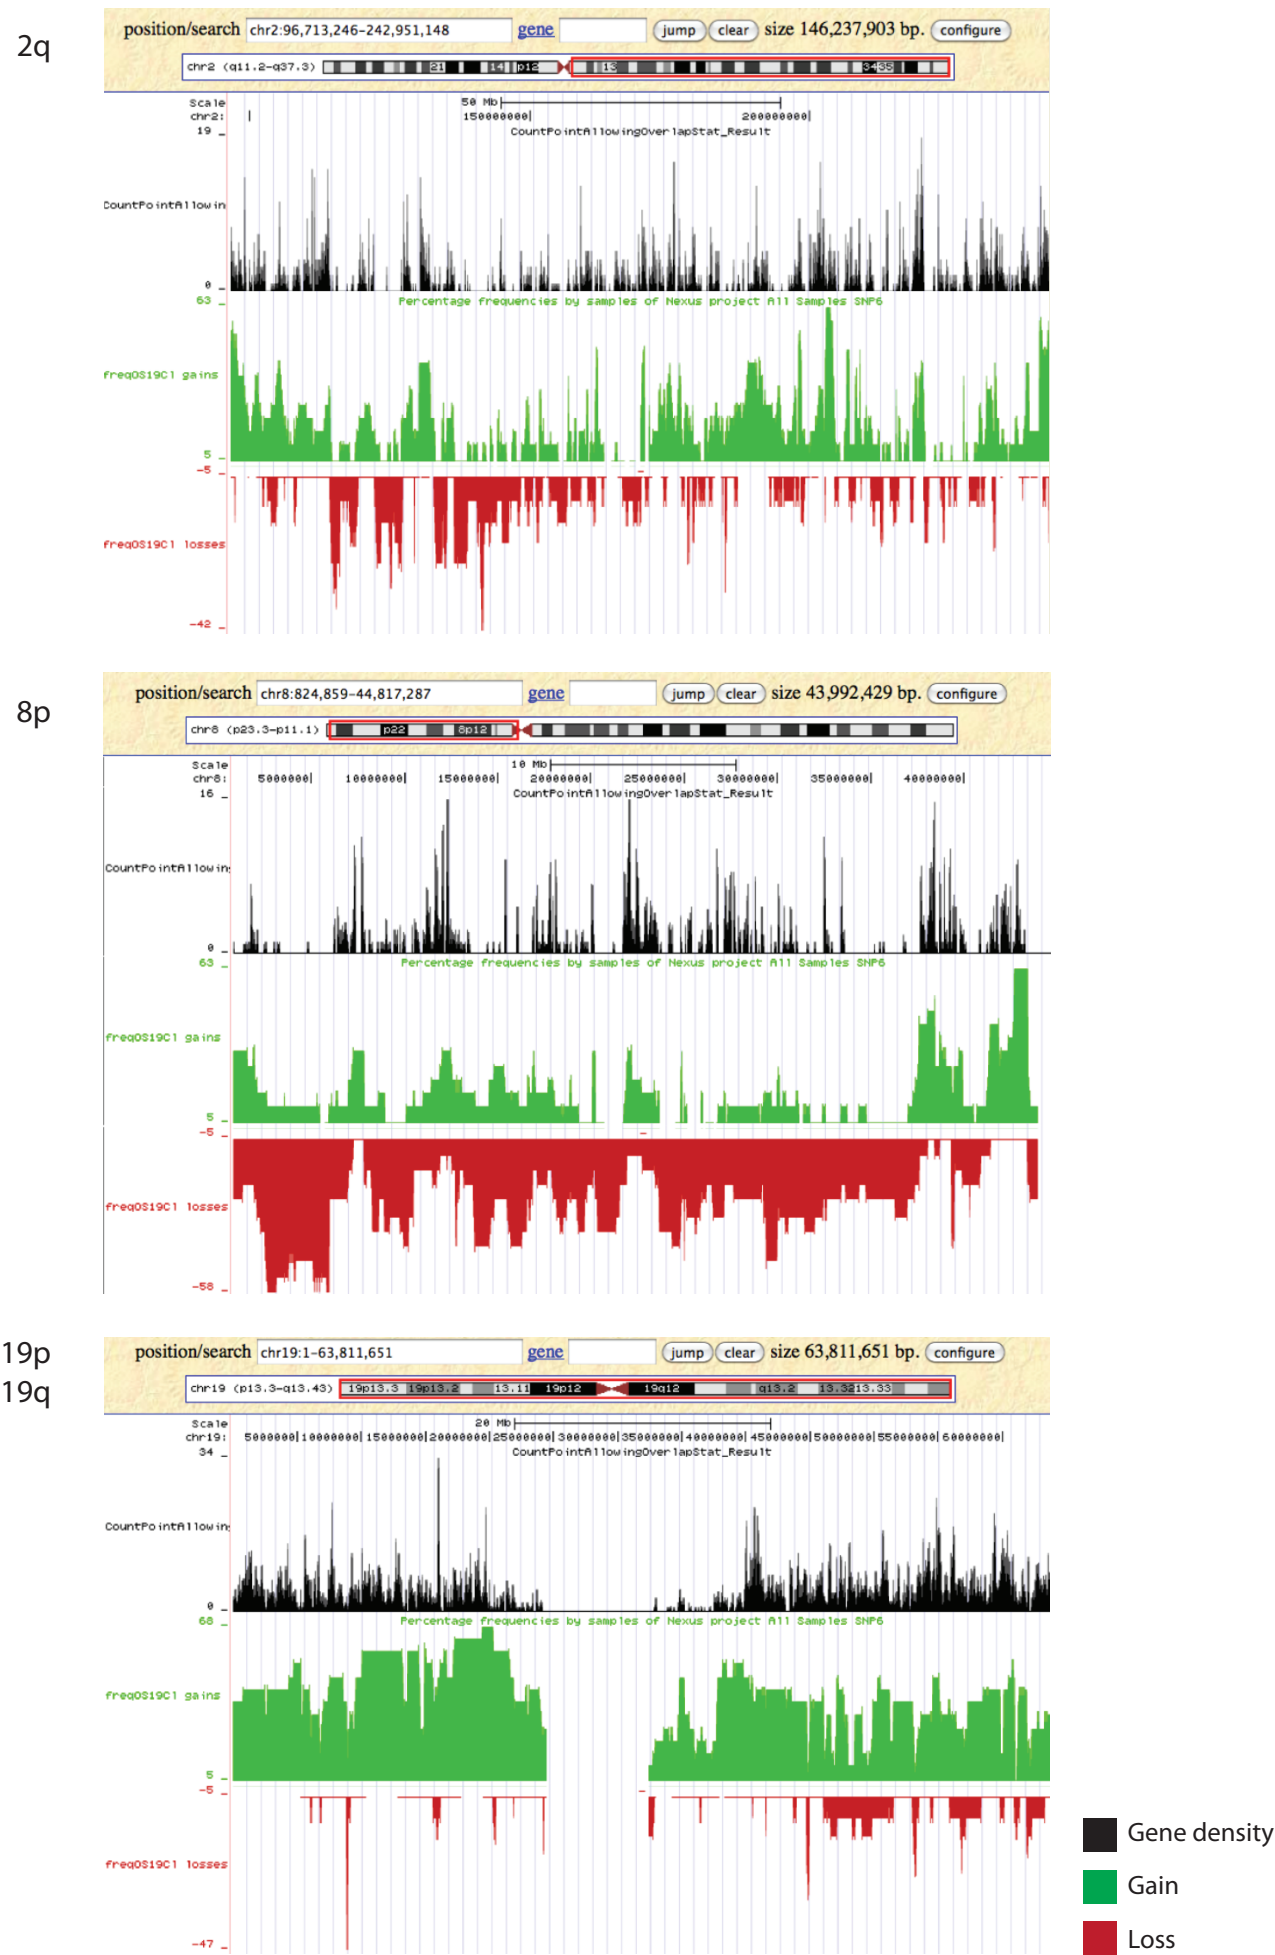

Supplement: S3 (10.1371/journal.pone.0048262.s003) [file journal.pone.0048262.s003]
