# Supplementary material for: Integrative Analysis Reveals Relationships of Genetic and Epigenetic Alterations in Osteosarcoma
Source: PLoS One. 2012 Nov 7;7(11):e48262. doi: 10.1371/journal.pone.0048262 (PMC3492335; doi:10.1371/journal.pone.0048262)
Supplement: Table S10 — Top 10 clusters from enrichment analysis of 158 genes with hyper-methylation and under-expression in DAVID. (XLSX) [file pone.0048262.s018.xlsx]

## Sheet: Table S10
Table S10. Top 10 clusters from enrichment analysis of 158 genes with hyper-methylation and under-expression in DAVID (Kresse et al)
Annotation Cluster 1	Enrichment Score: 5.941376825110008
Category	Term	Count	%	PValue	Genes	List Total	Pop Hits	Pop Total	Fold Enrichment	Bonferroni	Benjamini	FDR
SP_PIR_KEYWORDS	signal	61	39.6104	1.44e-08	ILMN_1726030, ILMN_1768227, ILMN_1773650, ILMN_1708275, ILMN_1701748, ILMN_1764788, ILMN_1701308, ILMN_1765258, ILMN_1665033, ILMN_1666269, ILMN_1666894, ILMN_1797776, ILMN_1733515, ILMN_1673880, ILMN_1708934, ILMN_1656057, ILMN_1697733, ILMN_1780599, ILMN_1761540, ILMN_1751161, ILMN_1774207, ILMN_1740938, ILMN_1738742, ILMN_1752965, ILMN_1736178, ILMN_1653711, ILMN_1773337, ILMN_1787897, ILMN_18…	152	2333	11710	2.01432	4.29e-06	2.14e-06	1.92e-05
UP_SEQ_FEATURE	signal peptide	61	39.6104	1.47e-08	ILMN_1726030, ILMN_1768227, ILMN_1773650, ILMN_1708275, ILMN_1701748, ILMN_1764788, ILMN_1701308, ILMN_1765258, ILMN_1665033, ILMN_1666269, ILMN_1666894, ILMN_1797776, ILMN_1733515, ILMN_1673880, ILMN_1708934, ILMN_1656057, ILMN_1697733, ILMN_1780599, ILMN_1761540, ILMN_1751161, ILMN_1774207, ILMN_1740938, ILMN_1738742, ILMN_1752965, ILMN_1736178, ILMN_1653711, ILMN_1773337, ILMN_1787897, ILMN_18…	152	2333	11703	2.01312	9.81e-06	9.81e-06	2.21e-05
SP_PIR_KEYWORDS	Secreted	41	26.6234	3.14e-08	ILMN_1728445, ILMN_1744381, ILMN_1678812, ILMN_1666672, ILMN_1726030, ILMN_1768227, ILMN_1701748, ILMN_1773079, ILMN_1764788, ILMN_1752562, ILMN_1663866, ILMN_1785272, ILMN_1701308, ILMN_1789507, ILMN_1772612, ILMN_1711439, ILMN_1722898, ILMN_1797776, ILMN_1684554, ILMN_1733515, ILMN_1673880, ILMN_1766914, ILMN_1708934, ILMN_1656057, ILMN_1780599, ILMN_1697733, ILMN_1675453, ILMN_1761540, ILMN_17…	152	1247	11710	2.53297	9.36e-06	3.12e-06	4.19e-05
GOTERM_CC_FAT	GO:0005576~extracellular region	45	29.2208	5.21e-07	ILMN_1728445, ILMN_1678812, ILMN_1744381, ILMN_1666672, ILMN_1726030, ILMN_1768227, ILMN_1701748, ILMN_1773079, ILMN_1764788, ILMN_1752562, ILMN_1663866, ILMN_1785272, ILMN_1701308, ILMN_1789507, ILMN_1772612, ILMN_1711439, ILMN_1722898, ILMN_1797776, ILMN_1684554, ILMN_1733515, ILMN_1673880, ILMN_1766914, ILMN_1708934, ILMN_1656057, ILMN_1660332, ILMN_1780599, ILMN_1697733, ILMN_1726589, ILMN_16…	125	1455	8521	2.10829	9.79e-05	9.79e-05	0.000646
UP_SEQ_FEATURE	disulfide bond	50	32.4675	8.51e-07	ILMN_1678812, ILMN_1768227, ILMN_1773650, ILMN_1708275, ILMN_1701748, ILMN_1666940, ILMN_1764788, ILMN_1701308, ILMN_1665033, ILMN_1765258, ILMN_1666269, ILMN_1666894, ILMN_1797776, ILMN_1767766, ILMN_1673880, ILMN_1733515, ILMN_1708934, ILMN_1697733, ILMN_1780599, ILMN_1656057, ILMN_1761540, ILMN_1751161, ILMN_1774207, ILMN_1738742, ILMN_1752965, ILMN_1653711, ILMN_1773337, ILMN_1787897, ILMN_17…	152	1924	11703	2.00087	0.000567	0.000189	0.00127554
SP_PIR_KEYWORDS	glycoprotein	65	42.2078	1.44e-06	ILMN_1678812, ILMN_1682332, ILMN_1768227, ILMN_1773650, ILMN_1708275, ILMN_1657502, ILMN_1701748, ILMN_1764788, ILMN_1666940, ILMN_1701308, ILMN_1765258, ILMN_1665033, ILMN_1763837, ILMN_1666269, ILMN_1666894, ILMN_1797776, ILMN_1733515, ILMN_1673880, ILMN_1651478, ILMN_1656057, ILMN_1697733, ILMN_1780599, ILMN_1738913, ILMN_1761540, ILMN_1800091, ILMN_1751161, ILMN_1774207, ILMN_1740938, ILMN_17…	152	2904	11710	1.72437	0.00043	6.14e-05	0.00192676
SP_PIR_KEYWORDS	disulfide bond	50	32.4675	3.02e-06	ILMN_1678812, ILMN_1768227, ILMN_1773650, ILMN_1708275, ILMN_1701748, ILMN_1666940, ILMN_1764788, ILMN_1701308, ILMN_1665033, ILMN_1765258, ILMN_1666269, ILMN_1666894, ILMN_1797776, ILMN_1767766, ILMN_1673880, ILMN_1733515, ILMN_1708934, ILMN_1697733, ILMN_1780599, ILMN_1656057, ILMN_1761540, ILMN_1751161, ILMN_1774207, ILMN_1738742, ILMN_1752965, ILMN_1653711, ILMN_1773337, ILMN_1787897, ILMN_17…	152	2009	11710	1.91736	0.0009	0.0001	0.00403264
GOTERM_CC_FAT	GO:0044421~extracellular region part	30	19.4805	3.57e-06	ILMN_1678812, ILMN_1728445, ILMN_1666672, ILMN_1768227, ILMN_1701748, ILMN_1773079, ILMN_1752562, ILMN_1663866, ILMN_1785272, ILMN_1701308, ILMN_1789507, ILMN_1772612, ILMN_1711439, ILMN_1684554, ILMN_1673880, ILMN_1733515, ILMN_1766914, ILMN_1708934, ILMN_1780599, ILMN_1726589, ILMN_1761540, ILMN_1774602, ILMN_1751161, ILMN_1774207, ILMN_1735877, ILMN_1740938, ILMN_1738742, ILMN_1752965, ILMN_18…	125	811	8521	2.52163	0.000671	0.000168	0.00443186
UP_SEQ_FEATURE	glycosylation site:N-linked (GlcNAc...)	61	39.6104	6.37e-06	ILMN_1678812, ILMN_1682332, ILMN_1768227, ILMN_1773650, ILMN_1708275, ILMN_1657502, ILMN_1701748, ILMN_1764788, ILMN_1666940, ILMN_1701308, ILMN_1765258, ILMN_1763837, ILMN_1666269, ILMN_1666894, ILMN_1797776, ILMN_1733515, ILMN_1673880, ILMN_1651478, ILMN_1656057, ILMN_1697733, ILMN_1780599, ILMN_1738913, ILMN_1761540, ILMN_1800091, ILMN_1751161, ILMN_1774207, ILMN_1738742, ILMN_1770338, ILMN_17…	152	2759	11703	1.70228	0.0042341	0.00106021	0.00954337
GOTERM_CC_FAT	GO:0005615~extracellular space	17	11.039	0.0131573	ILMN_1728445, ILMN_1708934, ILMN_1780599, ILMN_1761540, ILMN_1773079, ILMN_1752562, ILMN_1774207, ILMN_1663866, ILMN_1785272, ILMN_1740938, ILMN_1738742, ILMN_1752965, ILMN_1706643, ILMN_1772612, ILMN_1788107, ILMN_1787897, ILMN_1733515	125	600	8521	1.93143	0.91709	0.241692	15.1534
Annotation Cluster 2	Enrichment Score: 4.136322374500403
Category	Term	Count	%	PValue	Genes	List Total	Pop Hits	Pop Total	Fold Enrichment	Bonferroni	Benjamini	FDR
SP_PIR_KEYWORDS	extracellular matrix	14	9.09091	1.14e-06	ILMN_1678812, ILMN_1766914, ILMN_1666672, ILMN_1768227, ILMN_1701748, ILMN_1773079, ILMN_1751161, ILMN_1774602, ILMN_1663866, ILMN_1785272, ILMN_1701308, ILMN_1706643, ILMN_1711439, ILMN_1789507, ILMN_1684554, ILMN_1795442	152	192	11710	5.61746	0.000341	5.68e-05	0.00152612
GOTERM_CC_FAT	GO:0005578~proteinaceous extracellular matrix	16	10.3896	2.67e-06	ILMN_1678812, ILMN_1666672, ILMN_1766914, ILMN_1768227, ILMN_1726589, ILMN_1701748, ILMN_1773079, ILMN_1751161, ILMN_1774602, ILMN_1663866, ILMN_1735877, ILMN_1785272, ILMN_1701308, ILMN_1706643, ILMN_1711439, ILMN_1789507, ILMN_1684554, ILMN_1795442, ILMN_1673880	125	247	8521	4.41574	0.000501	0.000167	0.00330958
GOTERM_BP_FAT	GO:0007155~cell adhesion	20	12.987	0.00028	ILMN_1678812, ILMN_1773563, ILMN_1702105, ILMN_1779875, ILMN_1766914, ILMN_1678842, ILMN_1773079, ILMN_1751161, ILMN_1675978, ILMN_1672596, ILMN_1663866, ILMN_1779071, ILMN_1736178, ILMN_1789507, ILMN_1706643, ILMN_1711439, ILMN_1694130, ILMN_1684554, ILMN_1795442, ILMN_1721901	135	546	9333	2.53236	0.280499	0.103926	0.451068
GOTERM_BP_FAT	GO:0022610~biological adhesion	20	12.987	0.000287	ILMN_1678812, ILMN_1773563, ILMN_1702105, ILMN_1779875, ILMN_1766914, ILMN_1678842, ILMN_1773079, ILMN_1751161, ILMN_1675978, ILMN_1672596, ILMN_1663866, ILMN_1779071, ILMN_1736178, ILMN_1789507, ILMN_1706643, ILMN_1711439, ILMN_1694130, ILMN_1684554, ILMN_1795442, ILMN_1721901	135	547	9333	2.52773	0.286032	0.0807795	0.461621
SP_PIR_KEYWORDS	cell adhesion	11	7.14286	0.00848441	ILMN_1663866, ILMN_1702105, ILMN_1766914, ILMN_1711439, ILMN_1706643, ILMN_1678842, ILMN_1684554, ILMN_1795442, ILMN_1751161, ILMN_1672596, ILMN_1675978	152	320	11710	2.64823	0.921066	0.119229	10.7514
Annotation Cluster 3	Enrichment Score: 3.554136767401348
Category	Term	Count	%	PValue	Genes	List Total	Pop Hits	Pop Total	Fold Enrichment	Bonferroni	Benjamini	FDR
SP_PIR_KEYWORDS	trimer	8	5.19481	1.06e-08	ILMN_1785272, ILMN_1701308, ILMN_1706643, ILMN_1789507, ILMN_1678842, ILMN_1773079, ILMN_1684554, ILMN_1751161	152	23	11710	26.7963	3.17e-06	3.17e-06	1.42e-05
UP_SEQ_FEATURE	short sequence motif:Cell attachment site	11	7.14286	4.96e-08	ILMN_1728445, ILMN_1663866, ILMN_1766914, ILMN_1703074, ILMN_1701308, ILMN_1706643, ILMN_1678842, ILMN_1809793, ILMN_1684554, ILMN_1795442, ILMN_1751161	152	77	11703	10.9991	3.31e-05	1.65e-05	7.44e-05
SP_PIR_KEYWORDS	triple helix	7	4.54545	7.74e-07	ILMN_1785272, ILMN_1701308, ILMN_1706643, ILMN_1789507, ILMN_1773079, ILMN_1684554, ILMN_1751161	152	26	11710	20.7414	0.000231	5.77e-05	0.00103378
SP_PIR_KEYWORDS	hydroxylysine	7	4.54545	9.85e-07	ILMN_1785272, ILMN_1701308, ILMN_1706643, ILMN_1789507, ILMN_1773079, ILMN_1684554, ILMN_1751161	152	27	11710	19.9732	0.000294	5.87e-05	0.00131507
SP_PIR_KEYWORDS	extracellular matrix	14	9.09091	1.14e-06	ILMN_1678812, ILMN_1766914, ILMN_1666672, ILMN_1768227, ILMN_1701748, ILMN_1773079, ILMN_1751161, ILMN_1774602, ILMN_1663866, ILMN_1785272, ILMN_1701308, ILMN_1706643, ILMN_1711439, ILMN_1789507, ILMN_1684554, ILMN_1795442	152	192	11710	5.61746	0.000341	5.68e-05	0.00152612
INTERPRO	IPR008160:Collagen triple helix repeat	9	5.84416	1.48e-06	ILMN_1785272, ILMN_1701308, ILMN_1711439, ILMN_1706643, ILMN_1789507, ILMN_1773079, ILMN_1723358, ILMN_1684554, ILMN_1751161	147	61	10799	10.8387	0.000526	0.000526	0.00202948
GOTERM_CC_FAT	GO:0031012~extracellular matrix	17	11.039	1.59e-06	ILMN_1678812, ILMN_1666672, ILMN_1766914, ILMN_1768227, ILMN_1726589, ILMN_1701748, ILMN_1773079, ILMN_1751161, ILMN_1774602, ILMN_1663866, ILMN_1735877, ILMN_1785272, ILMN_1701308, ILMN_1800739, ILMN_1789507, ILMN_1706643, ILMN_1711439, ILMN_1684554, ILMN_1795442, ILMN_1673880	125	269	8521	4.30801	0.000298	0.000149	0.00196687
GOTERM_CC_FAT	GO:0005578~proteinaceous extracellular matrix	16	10.3896	2.67e-06	ILMN_1678812, ILMN_1666672, ILMN_1766914, ILMN_1768227, ILMN_1726589, ILMN_1701748, ILMN_1773079, ILMN_1751161, ILMN_1774602, ILMN_1663866, ILMN_1735877, ILMN_1785272, ILMN_1701308, ILMN_1706643, ILMN_1711439, ILMN_1789507, ILMN_1684554, ILMN_1795442, ILMN_1673880	125	247	8521	4.41574	0.000501	0.000167	0.00330958
SP_PIR_KEYWORDS	hydroxyproline	7	4.54545	2.86e-06	ILMN_1785272, ILMN_1701308, ILMN_1706643, ILMN_1789507, ILMN_1773079, ILMN_1684554, ILMN_1751161	152	32	11710	16.8524	0.000852	0.000107	0.00381733
SP_PIR_KEYWORDS	collagen	9	5.84416	3.05e-06	ILMN_1785272, ILMN_1701308, ILMN_1711439, ILMN_1706643, ILMN_1789507, ILMN_1773079, ILMN_1723358, ILMN_1684554, ILMN_1751161	152	70	11710	9.90508	0.000908	9.08e-05	0.00406872
GOTERM_CC_FAT	GO:0005581~collagen	7	4.54545	4.6e-06	ILMN_1785272, ILMN_1701308, ILMN_1706643, ILMN_1789507, ILMN_1773079, ILMN_1684554, ILMN_1751161	125	31	8521	15.3928	0.000864	0.000173	0.00570451
GOTERM_CC_FAT	GO:0044420~extracellular matrix part	9	5.84416	3.89e-05	ILMN_1785272, ILMN_1766914, ILMN_1701308, ILMN_1706643, ILMN_1789507, ILMN_1773079, ILMN_1684554, ILMN_1795442, ILMN_1751161	125	88	8521	6.97173	0.00729431	0.00121943	0.0483029
UP_SEQ_FEATURE	propeptide:N-terminal propeptide	4	2.5974	4.09e-05	ILMN_1785272, ILMN_1701308, ILMN_1789507, ILMN_1773079	152	6	11703	51.3289	0.0268948	0.00543777	0.061303
UP_SEQ_FEATURE	region of interest:Triple-helical region	5	3.24675	7.08e-05	ILMN_1701308, ILMN_1706643, ILMN_1789507, ILMN_1773079, ILMN_1751161	152	18	11703	21.3871	0.0460552	0.00782745	0.105995
KEGG_PATHWAY	hsa04512:ECM-receptor interaction	8	5.19481	0.000108	ILMN_1785272, ILMN_1701308, ILMN_1706643, ILMN_1789507, ILMN_1678842, ILMN_1773079, ILMN_1795442, ILMN_1675978	60	75	3923	6.97422	0.00980735	0.00980735	0.118004
UP_SEQ_FEATURE	propeptide:C-terminal propeptide	4	2.5974	0.000112	ILMN_1785272, ILMN_1701308, ILMN_1789507, ILMN_1773079	152	8	11703	38.4967	0.0721643	0.010643	0.168329
SP_PIR_KEYWORDS	hydroxylation	7	4.54545	0.000117	ILMN_1785272, ILMN_1701308, ILMN_1706643, ILMN_1789507, ILMN_1773079, ILMN_1684554, ILMN_1751161	152	60	11710	8.98794	0.0343779	0.0031752	0.156588
UP_SEQ_FEATURE	glycosylation site:O-linked (Gal...)	4	2.5974	0.000167	ILMN_1701308, ILMN_1706643, ILMN_1773079, ILMN_1751161	152	9	11703	34.2193	0.105322	0.0138151	0.25001
UP_SEQ_FEATURE	domain:Fibrillar collagen NC1	4	2.5974	0.000236	ILMN_1785272, ILMN_1701308, ILMN_1789507, ILMN_1773079	152	10	11703	30.7974	0.145714	0.0173466	0.353609
INTERPRO	IPR000885:Fibrillar collagen, C-terminal	4	2.5974	0.000271	ILMN_1785272, ILMN_1701308, ILMN_1789507, ILMN_1773079	147	10	10799	29.385	0.0917277	0.0469668	0.370757
KEGG_PATHWAY	hsa04510:Focal adhesion	11	7.14286	0.000272	ILMN_1815057, ILMN_1785272, ILMN_1701308, ILMN_1706643, ILMN_1789507, ILMN_1678842, ILMN_1773079, ILMN_1709795, ILMN_1795442, ILMN_1672596, ILMN_1675978	60	179	3923	4.01797	0.0244751	0.0123134	0.296423
GOTERM_MF_FAT	GO:0005201~extracellular matrix structural constituent	7	4.54545	0.000308	ILMN_1785272, ILMN_1701308, ILMN_1711439, ILMN_1789507, ILMN_1773079, ILMN_1795442, ILMN_1774602	118	70	8858	7.50678	0.0884243	0.0884243	0.41038
SMART	SM00038:COLFI	4	2.5974	0.000339	ILMN_1785272, ILMN_1701308, ILMN_1789507, ILMN_1773079	91	10	6140	26.989	0.026452	0.026452	0.359215
GOTERM_MF_FAT	GO:0048407~platelet-derived growth factor binding	4	2.5974	0.000343	ILMN_1815057, ILMN_1785272, ILMN_1701308, ILMN_1773079	118	11	8858	27.2974	0.0981143	0.0503234	0.457643
GOTERM_CC_FAT	GO:0005583~fibrillar collagen	4	2.5974	0.000601	ILMN_1785272, ILMN_1701308, ILMN_1789507, ILMN_1773079	125	12	8521	22.7227	0.106905	0.0160221	0.74337
UP_SEQ_FEATURE	region of interest:Nonhelical region (C-terminal)	3	1.94805	0.000976	ILMN_1701308, ILMN_1789507, ILMN_1773079	152	4	11703	57.7451	0.47798	0.0629372	1.4515
SP_PIR_KEYWORDS	skin	3	1.94805	0.00161028	ILMN_1785272, ILMN_1701308, ILMN_1773079	152	5	11710	46.2237	0.381372	0.0337219	2.12838
GOTERM_BP_FAT	GO:0030198~extracellular matrix organization	7	4.54545	0.0019237	ILMN_1663866, ILMN_1785272, ILMN_1666672, ILMN_1701308, ILMN_1768227, ILMN_1711439, ILMN_1789507, ILMN_1701748, ILMN_1773079	135	91	9333	5.31795	0.895712	0.313924	3.0568
PIR_SUPERFAMILY	PIRSF002255:collagen alpha 1(I) chain	3	1.94805	0.00196997	ILMN_1785272, ILMN_1701308, ILMN_1773079	78	5	5375	41.3462	0.172465	0.172465	2.14844
GOTERM_MF_FAT	GO:0005198~structural molecule activity	15	9.74026	0.00293173	ILMN_1672660, ILMN_1753924, ILMN_1678842, ILMN_1773079, ILMN_1774602, ILMN_1697132, ILMN_1785272, ILMN_1702636, ILMN_1716407, ILMN_1701308, ILMN_1711439, ILMN_1789507, ILMN_1694130, ILMN_1684554, ILMN_1795442, ILMN_1721901	118	461	8858	2.44255	0.586768	0.118605	3.84937
GOTERM_MF_FAT	GO:0050840~extracellular matrix binding	4	2.5974	0.00328008	ILMN_1663866, ILMN_1666672, ILMN_1768227, ILMN_1789507, ILMN_1701748, ILMN_1774602	118	23	8858	13.0553	0.628024	0.116281	4.29753
GOTERM_BP_FAT	GO:0030199~collagen fibril organization	4	2.5974	0.0059099	ILMN_1785272, ILMN_1701308, ILMN_1789507, ILMN_1773079	135	26	9333	10.6359	0.99905	0.580986	9.11414
SP_PIR_KEYWORDS	Ehlers-Danlos syndrome	3	1.94805	0.00694554	ILMN_1785272, ILMN_1701308, ILMN_1773079	152	10	11710	23.1118	0.874694	0.12174	8.8845
GOTERM_CC_FAT	GO:0030934~anchoring collagen	3	1.94805	0.00707349	ILMN_1706643, ILMN_1684554, ILMN_1751161	125	9	8521	22.7227	0.736721	0.153646	8.4305
GOTERM_MF_FAT	GO:0019838~growth factor binding	6	3.8961	0.00945401	ILMN_1728445, ILMN_1815057, ILMN_1785272, ILMN_1701308, ILMN_1809793, ILMN_1773079	118	98	8858	4.59599	0.942685	0.248677	11.9266
GOTERM_BP_FAT	GO:0043062~extracellular structure organization	7	4.54545	0.0148627	ILMN_1663866, ILMN_1785272, ILMN_1666672, ILMN_1701308, ILMN_1768227, ILMN_1711439, ILMN_1789507, ILMN_1701748, ILMN_1773079	135	139	9333	3.48153	1	0.644454	21.4491
SP_PIR_KEYWORDS	pyroglutamic acid	4	2.5974	0.0189275	ILMN_1785272, ILMN_1701308, ILMN_1706643, ILMN_1773079	152	44	11710	7.00359	0.996635	0.228052	22.5155
GOTERM_BP_FAT	GO:0001501~skeletal system development	10	6.49351	0.0197439	ILMN_1815057, ILMN_1668675, ILMN_1785272, ILMN_1701308, ILMN_1736178, ILMN_1789507, ILMN_1672908, ILMN_1777397, ILMN_1665033, ILMN_1773079	135	281	9333	2.46026	1	0.672026	27.4945
SP_PIR_KEYWORDS	Pyrrolidone carboxylic acid	4	2.5974	0.0404421	ILMN_1779875, ILMN_1785272, ILMN_1701308, ILMN_1706643	152	59	11710	5.22302	0.999995	0.388652	42.3683
GOTERM_BP_FAT	GO:0043588~skin development	3	1.94805	0.0425245	ILMN_1785272, ILMN_1701308, ILMN_1773079	135	23	9333	9.01739	1	0.776977	50.3718
GOTERM_BP_FAT	GO:0008544~epidermis development	6	3.8961	0.0617347	ILMN_1785272, ILMN_1701308, ILMN_1697733, ILMN_1801616, ILMN_1773079, ILMN_1751161	135	148	9333	2.8027	1	0.831564	64.2054
GOTERM_BP_FAT	GO:0048729~tissue morphogenesis	6	3.8961	0.0631752	ILMN_1773563, ILMN_1785272, ILMN_1701308, ILMN_1752965, ILMN_1789507, ILMN_1672908	135	149	9333	2.78389	1	0.831652	65.0812
GOTERM_BP_FAT	GO:0007398~ectoderm development	6	3.8961	0.0802633	ILMN_1785272, ILMN_1701308, ILMN_1697733, ILMN_1801616, ILMN_1773079, ILMN_1751161	135	160	9333	2.5925	1	0.85427	74.0486
SP_PIR_KEYWORDS	chromosomal rearrangement	3	1.94805	0.755201	ILMN_1815057, ILMN_1785272, ILMN_1701308	152	209	11710	1.10583	1	0.998423	100
Annotation Cluster 4	Enrichment Score: 3.1254852639145048
Category	Term	Count	%	PValue	Genes	List Total	Pop Hits	Pop Total	Fold Enrichment	Bonferroni	Benjamini	FDR
SP_PIR_KEYWORDS	trimer	8	5.19481	1.06e-08	ILMN_1785272, ILMN_1701308, ILMN_1706643, ILMN_1789507, ILMN_1678842, ILMN_1773079, ILMN_1684554, ILMN_1751161	152	23	11710	26.7963	3.17e-06	3.17e-06	1.42e-05
INTERPRO	IPR003129:Laminin G, thrombospondin-type, N-terminal	3	1.94805	0.0294147	ILMN_1789507, ILMN_1678842, ILMN_1684554	147	20	10799	11.0194	0.999975	0.692	33.5816
UP_SEQ_FEATURE	domain:TSP N-terminal	3	1.94805	0.0295821	ILMN_1789507, ILMN_1678842, ILMN_1684554	152	21	11703	10.9991	1	0.760331	36.2263
SMART	SM00210:TSPN	3	1.94805	0.0340211	ILMN_1789507, ILMN_1678842, ILMN_1684554	91	20	6140	10.1209	0.935071	0.366023	30.7234
Annotation Cluster 5	Enrichment Score: 2.5173212901756528
Category	Term	Count	%	PValue	Genes	List Total	Pop Hits	Pop Total	Fold Enrichment	Bonferroni	Benjamini	FDR
GOTERM_MF_FAT	GO:0004866~endopeptidase inhibitor activity	8	5.19481	0.000514	ILMN_1744381, ILMN_1723962, ILMN_1800739, ILMN_1706643, ILMN_1697733, ILMN_1788874, ILMN_1809793, ILMN_1751161	118	107	8858	5.61255	0.143389	0.0502823	0.685106
GOTERM_MF_FAT	GO:0030414~peptidase inhibitor activity	8	5.19481	0.000677	ILMN_1744381, ILMN_1723962, ILMN_1800739, ILMN_1706643, ILMN_1697733, ILMN_1788874, ILMN_1809793, ILMN_1751161	118	112	8858	5.36199	0.184304	0.0496533	0.900774
UP_SEQ_FEATURE	site:Reactive bond	5	3.24675	0.00113786	ILMN_1744381, ILMN_1800739, ILMN_1706643, ILMN_1788874, ILMN_1751161	152	36	11703	10.6935	0.531514	0.0666095	1.69104
GOTERM_MF_FAT	GO:0004867~serine-type endopeptidase inhibitor activity	6	3.8961	0.00198254	ILMN_1744381, ILMN_1800739, ILMN_1706643, ILMN_1788874, ILMN_1809793, ILMN_1751161	118	68	8858	6.62363	0.449725	0.0947608	2.61836
SP_PIR_KEYWORDS	protease inhibitor	6	3.8961	0.00330829	ILMN_1744381, ILMN_1800739, ILMN_1706643, ILMN_1697733, ILMN_1788874, ILMN_1751161	152	78	11710	5.92611	0.627495	0.0637134	4.32727
GOTERM_MF_FAT	GO:0004857~enzyme inhibitor activity	9	5.84416	0.00636059	ILMN_1744381, ILMN_1723962, ILMN_1800739, ILMN_1706643, ILMN_1697733, ILMN_1672908, ILMN_1788874, ILMN_1809793, ILMN_1751161	118	209	8858	3.23258	0.853488	0.192172	8.17737
SP_PIR_KEYWORDS	Serine protease inhibitor	5	3.24675	0.00698061	ILMN_1744381, ILMN_1800739, ILMN_1706643, ILMN_1788874, ILMN_1751161	152	59	11710	6.52877	0.876005	0.115555	8.92744
INTERPRO	IPR002223:Proteinase inhibitor I2, Kunitz metazoa	3	1.94805	0.0128425	ILMN_1800739, ILMN_1706643, ILMN_1751161	147	13	10799	16.9529	0.989833	0.436494	16.235
SMART	SM00131:KU	3	1.94805	0.0149222	ILMN_1800739, ILMN_1706643, ILMN_1751161	91	13	6140	15.5706	0.69509	0.211441	14.7377
Annotation Cluster 6	Enrichment Score: 2.240042098831835
Category	Term	Count	%	PValue	Genes	List Total	Pop Hits	Pop Total	Fold Enrichment	Bonferroni	Benjamini	FDR
GOTERM_BP_FAT	GO:0006979~response to oxidative stress	9	5.84416	0.000936	ILMN_1744381, ILMN_1726030, ILMN_1701308, ILMN_1740938, ILMN_1708275, ILMN_1758128, ILMN_1723358, ILMN_1767766, ILMN_1771841	135	141	9333	4.41277	0.666949	0.197394	1.49855
GOTERM_MF_FAT	GO:0016209~antioxidant activity	5	3.24675	0.00122885	ILMN_1726030, ILMN_1740938, ILMN_1708275, ILMN_1758128, ILMN_1767766	118	36	8858	10.4261	0.309343	0.071349	1.63052
GOTERM_MF_FAT	GO:0016684~oxidoreductase activity, acting on peroxide as acceptor	4	2.5974	0.00328008	ILMN_1726030, ILMN_1708275, ILMN_1758128, ILMN_1767766	118	23	8858	13.0553	0.628024	0.116281	4.29753
GOTERM_MF_FAT	GO:0004601~peroxidase activity	4	2.5974	0.00328008	ILMN_1726030, ILMN_1708275, ILMN_1758128, ILMN_1767766	118	23	8858	13.0553	0.628024	0.116281	4.29753
SP_PIR_KEYWORDS	peroxidase	3	1.94805	0.0220765	ILMN_1726030, ILMN_1708275, ILMN_1767766	152	18	11710	12.8399	0.998709	0.251167	25.7706
SP_PIR_KEYWORDS	heme	4	2.5974	0.132813	ILMN_1708275, ILMN_1758128, ILMN_1693338, ILMN_1767766	152	98	11710	3.14447	1	0.757199	85.0776
Annotation Cluster 7	Enrichment Score: 2.196770313321326
Category	Term	Count	%	PValue	Genes	List Total	Pop Hits	Pop Total	Fold Enrichment	Bonferroni	Benjamini	FDR
GOTERM_BP_FAT	GO:0001568~blood vessel development	12	7.79221	0.000178	ILMN_1779875, ILMN_1656057, ILMN_1705750, ILMN_1773079, ILMN_1774207, ILMN_1785272, ILMN_1679267, ILMN_1740938, ILMN_1701308, ILMN_1738742, ILMN_1763837, ILMN_1666894, ILMN_1795442	135	206	9333	4.02718	0.188477	0.188477	0.286394
GOTERM_BP_FAT	GO:0001944~vasculature development	12	7.79221	0.000219	ILMN_1779875, ILMN_1656057, ILMN_1705750, ILMN_1773079, ILMN_1774207, ILMN_1785272, ILMN_1679267, ILMN_1740938, ILMN_1701308, ILMN_1738742, ILMN_1763837, ILMN_1666894, ILMN_1795442	135	211	9333	3.93175	0.227049	0.120824	0.353057
GOTERM_BP_FAT	GO:0048514~blood vessel morphogenesis	8	5.19481	0.0141059	ILMN_1774207, ILMN_1779875, ILMN_1740938, ILMN_1679267, ILMN_1738742, ILMN_1656057, ILMN_1705750, ILMN_1763837, ILMN_1666894	135	178	9333	3.10712	1	0.671062	20.4706
GOTERM_BP_FAT	GO:0001525~angiogenesis	5	3.24675	0.109773	ILMN_1774207, ILMN_1779875, ILMN_1656057, ILMN_1763837, ILMN_1666894	135	127	9333	2.72178	1	0.885461	84.6601
SP_PIR_KEYWORDS	angiogenesis	3	1.94805	0.171795	ILMN_1774207, ILMN_1763837, ILMN_1666894	152	58	11710	3.9848	1	0.799089	91.9241
Annotation Cluster 8	Enrichment Score: 2.070178253601285
Category	Term	Count	%	PValue	Genes	List Total	Pop Hits	Pop Total	Fold Enrichment	Bonferroni	Benjamini	FDR
SP_PIR_KEYWORDS	egf-like domain	9	5.84416	0.00137581	ILMN_1735877, ILMN_1738742, ILMN_1708275, ILMN_1656057, ILMN_1726589, ILMN_1678842, ILMN_1675453, ILMN_1668283, ILMN_1774602, ILMN_1673880	152	166	11710	4.17684	0.336532	0.0336116	1.8211
INTERPRO	IPR013032:EGF-like region, conserved site	10	6.49351	0.00239473	ILMN_1735877, ILMN_1738742, ILMN_1708275, ILMN_1656057, ILMN_1726589, ILMN_1678842, ILMN_1675453, ILMN_1668283, ILMN_1795442, ILMN_1774602, ILMN_1673880	147	213	10799	3.44895	0.573076	0.24702	3.23267
INTERPRO	IPR006210:EGF-like	8	5.19481	0.00377176	ILMN_1738742, ILMN_1708275, ILMN_1656057, ILMN_1726589, ILMN_1678842, ILMN_1675453, ILMN_1668283, ILMN_1774602	147	147	10799	3.99796	0.738549	0.284931	5.04737
SMART	SM00181:EGF	8	5.19481	0.00556233	ILMN_1738742, ILMN_1708275, ILMN_1656057, ILMN_1726589, ILMN_1678842, ILMN_1675453, ILMN_1668283, ILMN_1774602	91	147	6140	3.67197	0.356383	0.197742	5.74358
INTERPRO	IPR000742:EGF-like, type 3	7	4.54545	0.0121583	ILMN_1735877, ILMN_1738742, ILMN_1708275, ILMN_1656057, ILMN_1678842, ILMN_1675453, ILMN_1774602, ILMN_1673880	147	141	10799	3.64708	0.986998	0.462258	15.4357
UP_SEQ_FEATURE	domain:EGF-like	4	2.5974	0.027934	ILMN_1738742, ILMN_1708275, ILMN_1656057, ILMN_1668283	152	51	11703	6.0387	1	0.765769	34.5844
INTERPRO	IPR006209:EGF	4	2.5974	0.137446	ILMN_1738742, ILMN_1708275, ILMN_1726589, ILMN_1678842	147	95	10799	3.09316	1	0.936872	86.82
Annotation Cluster 9	Enrichment Score: 2.0256091941216776
Category	Term	Count	%	PValue	Genes	List Total	Pop Hits	Pop Total	Fold Enrichment	Bonferroni	Benjamini	FDR
INTERPRO	IPR001007:von Willebrand factor, type C	4	2.5974	0.00619147	ILMN_1701308, ILMN_1678842, ILMN_1809793, ILMN_1773079	147	28	10799	10.4947	0.889728	0.356582	8.15995
SMART	SM00214:VWC	4	2.5974	0.00765516	ILMN_1701308, ILMN_1678842, ILMN_1809793, ILMN_1773079	91	28	6140	9.63893	0.455063	0.1832	7.82606
GOTERM_MF_FAT	GO:0019838~growth factor binding	6	3.8961	0.00945401	ILMN_1728445, ILMN_1815057, ILMN_1785272, ILMN_1701308, ILMN_1809793, ILMN_1773079	118	98	8858	4.59599	0.942685	0.248677	11.9266
UP_SEQ_FEATURE	domain:VWFC	3	1.94805	0.0176278	ILMN_1701308, ILMN_1678842, ILMN_1773079	152	16	11703	14.4363	0.999993	0.627333	23.3884
Annotation Cluster 10	Enrichment Score: 2.019432419959227
Category	Term	Count	%	PValue	Genes	List Total	Pop Hits	Pop Total	Fold Enrichment	Bonferroni	Benjamini	FDR
GOTERM_MF_FAT	GO:0005201~extracellular matrix structural constituent	7	4.54545	0.000308	ILMN_1785272, ILMN_1701308, ILMN_1711439, ILMN_1789507, ILMN_1773079, ILMN_1795442, ILMN_1774602	118	70	8858	7.50678	0.0884243	0.0884243	0.41038
GOTERM_BP_FAT	GO:0030155~regulation of cell adhesion	6	3.8961	0.0264338	ILMN_1663866, ILMN_1701308, ILMN_1679267, ILMN_1711439, ILMN_1705750, ILMN_1795442, ILMN_1774602	135	117	9333	3.5453	1	0.730302	35.0737
GOTERM_BP_FAT	GO:0010810~regulation of cell-substrate adhesion	3	1.94805	0.107561	ILMN_1701308, ILMN_1711439, ILMN_1774602	135	39	9333	5.31795	1	0.884074	84.034
